# Supplementary material
Source: HighWire-hosted journal article supplement (https://bmjopen.bmj.com/content/14/2/e078794)
Supplement: inline-supplementary-material-3 [file inline-supplementary-material-3.pdf]

| Reference                                                                                                                                                         | Author           | Year | Sub-Saharan African Country/ies                                                                   | Setting       | Sexual or Gender Minority Population* | Stigmatized Attribute                            |
|-------------------------------------------------------------------------------------------------------------------------------------------------------------------|------------------|------|---------------------------------------------------------------------------------------------------|---------------|---------------------------------------|--------------------------------------------------|
| <b>MULTIPLE STIGMA STUDIES</b>                                                                                                                                    |                  |      |                                                                                                   |               |                                       |                                                  |
| <a href="https://doi.org/10.1921/jpts.v19i1-2.1674">https://doi.org/10.1921/jpts.v19i1-2.1674</a>                                                                 | Mange,           | 2022 | South Africa                                                                                      | Urban         | MSM                                   | HIV, Same-sex orientation                        |
| <a href="https://pubmed.ncbi.nlm.nih.gov/25014130/">https://pubmed.ncbi.nlm.nih.gov/25014130/</a>                                                                 | Kendall,         | 2014 | Angola                                                                                            | Urban         | MSM                                   | HIV, Same-sex orientation, Gender non-conformity |
| <a href="https://dx.doi.org/10.1097/QAD.0000000000000846">https://dx.doi.org/10.1097/QAD.0000000000000846</a>                                                     | Secor,           | 2015 | Kenya                                                                                             | Urban         | MSM                                   | HIV, Same-sex orientation                        |
| <a href="https://doi.org/10.1002/jia2.25323">https://doi.org/10.1002/jia2.25323</a>                                                                               | Kimani,          | 2019 | Kenya                                                                                             | Unknown       | TGW                                   | HIV, Same-sex orientation                        |
| <a href="https://doi.org/10.1177/17579759177375">https://doi.org/10.1177/17579759177375</a>                                                                       | Maleke,          | 2019 | South Africa                                                                                      | Urban & Rural | MSM                                   | HIV, Same-sex orientation                        |
| <a href="https://journals.plos.org/plosone/article?id=10.1371/journal.pone.0228307">https://journals.plos.org/plosone/article?id=10.1371/journal.pone.0228307</a> | Gamariel, Petros | 2020 | Mozambique                                                                                        | Urban         | MSM                                   | HIV, Same-sex orientation                        |
| <a href="https://onlinelibrary.wiley.com/doi/10.1111/j.1751-9861.2005.tb00001.x">https://onlinelibrary.wiley.com/doi/10.1111/j.1751-9861.2005.tb00001.x</a>       | Duncan,          | 2005 | South Africa                                                                                      | Unknown       | MSM                                   | HIV, Same-sex orientation                        |
| <a href="https://pubmed.ncbi.nlm.nih.gov/34923882/">https://pubmed.ncbi.nlm.nih.gov/34923882/</a>                                                                 | Nakiganda,       | 2021 | Uganda                                                                                            | Rural         | MSM                                   | HIV, Same-sex orientation                        |
| <a href="https://doi.org/10.1186/s12889-021-10314-w">https://doi.org/10.1186/s12889-021-10314-w</a>                                                               | Muller,          | 2021 | Botswana, Eswatini/Swaziland, Ethiopia, Kenya, Lesotho, Malawi, South Africa, Zambia and Zimbabwe | Unknown       | Other                                 | HIV, Same-sex orientation, Gender non-conformity |
| <a href="https://doi.org/10.1080/13691058.2022.2080273">https://doi.org/10.1080/13691058.2022.2080273</a>                                                         | Alio,            | 2022 | Senegal                                                                                           | Rural         | MSM                                   | HIV, Same-sex orientation                        |
| <b>SINGLE STIGMA STUDIES</b>                                                                                                                                      |                  |      |                                                                                                   |               |                                       |                                                  |
| <a href="https://doi.org/10.1080/1369105031000152715">https://doi.org/10.1080/1369105031000152715</a>                                                             | Niang,           | 2003 | Senegal                                                                                           | Urban         | MSM                                   | Same-sex orientation                             |

|                                                                                                                                                                                               |                   |      |              |               |          |                      |
|-----------------------------------------------------------------------------------------------------------------------------------------------------------------------------------------------|-------------------|------|--------------|---------------|----------|----------------------|
| <a href="https://dx.doi.org/10.1371/journal.pone.0151716">https://dx.doi.org/10.1371/journal.pone.0151716</a>                                                                                 | Karuga,           | 2016 | Kenya        | Urban & Rural | MSM      | HIV (PrEP)           |
| <a href="https://www.ncbi.nlm.nih.gov/pmc/articles/PMC5843994/">https://www.ncbi.nlm.nih.gov/pmc/articles/PMC5843994/</a>                                                                     | Duby,             | 2018 | South Africa | Rural         | MSM, WSW | Same-sex orientation |
| <a href="https://dx.doi.org/10.1016/j.healthplace.2017.11.010">https://dx.doi.org/10.1016/j.healthplace.2017.11.010</a>                                                                       | Hassan,           | 2018 | South Africa | Urban         | MSM      | Same-sex orientation |
| <a href="https://openaidsjournal.com/VOLUME/12/PAGE/69/">https://openaidsjournal.com/VOLUME/12/PAGE/69/</a>                                                                                   | Sabin1,           | 2018 | Ghana        | Urban & Rural | MSM      | Same-sex orientation |
| <a href="https://bmcinthealthhumrights.biomedcentral.com/track/pdf/10.1186/s12914-015-0067-6.pdf">https://bmcinthealthhumrights.biomedcentral.com/track/pdf/10.1186/s12914-015-0067-6.pdf</a> | Muzyamba,         | 2015 | Zambia       | Urban         | MSM      | Same-sex orientation |
| <a href="https://onlinelibrary.wiley.com/doi/full/10.1186/1758-2652-14-36">https://onlinelibrary.wiley.com/doi/full/10.1186/1758-2652-14-36</a>                                               | Baral,            | 2011 | Lesotho      | Urban         | MSM      | Same-sex orientation |
| <a href="https://bmcinthealthhumrights.biomedcentral.com/articles/10.1186/1472-698X-14-20">https://bmcinthealthhumrights.biomedcentral.com/articles/10.1186/1472-698X-14-20</a>               | Wirtz,            | 2014 | Malawi       | Urban         | MSM      | Same-sex orientation |
| <a href="https://onlinelibrary.wiley.com/doi/epdf/10.1002/jia2.25933">https://onlinelibrary.wiley.com/doi/epdf/10.1002/jia2.25933</a>                                                         | Tun,              | 2022 | Nigeria      | Urban         | TGW, TGM | Transgender identity |
| <a href="https://bmcinfectdis.biomedcentral.com/articles/10.1186/s12879-020-05310-1">https://bmcinfectdis.biomedcentral.com/articles/10.1186/s12879-020-05310-1</a>                           | Zhao,             | 2020 | Malawi       | Urban         | MSM      | Same-sex orientation |
| <a href="https://dx.doi.org/10.1371/journal.pone.0183265">https://dx.doi.org/10.1371/journal.pone.0183265</a>                                                                                 | Larsson,          | 2017 | Tanzania     | Urban         | MSM      | Same-sex orientation |
| <a href="https://pubmed.ncbi.nlm.nih.gov/27020779/">https://pubmed.ncbi.nlm.nih.gov/27020779/</a>                                                                                             | Coulaud,          | 2016 | Burundi      | Unknown       | MSM      | Same-sex orientation |
| <a href="https://bmcinthealthhumrights.biomedcentral.com/articles/10.1186/s12914-019-0190-x">https://bmcinthealthhumrights.biomedcentral.com/articles/10.1186/s12914-019-0190-x</a>           | Strömdahl,        | 2019 | Nigeria      | Urban         | MSM      | Same-sex orientation |
| <a href="https://www.ncbi.nlm.nih.gov/pmc/articles/PMC9259961/">https://www.ncbi.nlm.nih.gov/pmc/articles/PMC9259961/</a>                                                                     | LeeVan,           | 2022 | Nigeria      | Urban         | MSM, TGW | Same-sex orientation |
| <a href="https://www.ajol.info/index.php/thrb/article/view/94184/93784">https://www.ajol.info/index.php/thrb/article/view/94184/93784</a>                                                     | Magesa,           | 2014 | Tanzania     | Urban         | MSM      | Same-sex orientation |
| <a href="https://link.springer.com/article/10.1007%2Fs10461-017-1806-6">https://link.springer.com/article/10.1007%2Fs10461-017-1806-6</a>                                                     | Ogunbajo,         | 2018 | Ghana        | Urban         | MSM      | HIV                  |
| <a href="https://doi.org/10.25159/2520-5293/38">https://doi.org/10.25159/2520-5293/38</a>                                                                                                     | Mavhandu-Mudzusi, | 2014 | South Africa | Rural         | MSM, WSW | Same-sex orientation |
| <a href="https://journals.plos.org/plosone/article?id=10.1371/journal.pone.0064527">https://journals.plos.org/plosone/article?id=10.1371/journal.pone.0064527</a>                             | Taegtmeier,       | 2013 | Kenya        | Urban         | MSM      | Same-sex orientation |

|                                                                                                                                                                         |             |      |                                                                  |               |          |                      |
|-------------------------------------------------------------------------------------------------------------------------------------------------------------------------|-------------|------|------------------------------------------------------------------|---------------|----------|----------------------|
| <a href="https://dx.doi.org/10.1136/sextrans-2018-053892">https://dx.doi.org/10.1136/sextrans-2018-053892</a>                                                           | Coulaud,    | 2020 | Mali, Côte d'Ivoire, Burkina Faso and Togo                       | Unknown       | MSM      | Same-sex orientation |
| <a href="https://dx.doi.org/10.1089/AID.2015.0240">https://dx.doi.org/10.1089/AID.2015.0240</a>                                                                         | Brown,      | 2016 | Eswatini/Swaziland                                               | Unknown       | MSM      | Same-sex orientation |
| <a href="https://pubmed.ncbi.nlm.nih.gov/31399923/">https://pubmed.ncbi.nlm.nih.gov/31399923/</a>                                                                       | Maina,      | 2018 | Ghana                                                            | Urban         | MSM      | Same-sex orientation |
| <a href="https://dx.doi.org/10.1007/s10508-019-01513-z">https://dx.doi.org/10.1007/s10508-019-01513-z</a>                                                               | Coulaud,    | 2020 | Mali, Côte d'Ivoire, Burkina Faso and Togo                       | Unknown       | MSM      | Same-sex orientation |
| <a href="https://bmcpublichealth.biomedcentral.com/articles/10.1186/s12889-020-8195-x">https://bmcpublichealth.biomedcentral.com/articles/10.1186/s12889-020-8195-x</a> | Emmanuel,   | 2020 | Nigeria                                                          | Urban         | MSM      | HIV (PrEP)           |
| <a href="http://dx.doi.org/10.1080/09540121.2016.1146207">http://dx.doi.org/10.1080/09540121.2016.1146207</a>                                                           | Ahaneku,    | 2016 | Tanzania                                                         | Urban         | MSM      | Same-sex orientation |
| <a href="https://link.springer.com/article/10.1007/s10461-015-1094-y">https://link.springer.com/article/10.1007/s10461-015-1094-y</a>                                   | Stahlman,   | 2015 | Lesotho                                                          | Urban         | MSM      | Same-sex orientation |
| <a href="https://pubmed.ncbi.nlm.nih.gov/27425206/">https://pubmed.ncbi.nlm.nih.gov/27425206/</a>                                                                       | Wendi,      | 2016 | Lesotho                                                          | Urban         | MSM      | Same-sex orientation |
| <a href="https://dx.doi.org/10.1186/s12879-019-3693-0">https://dx.doi.org/10.1186/s12879-019-3693-0</a>                                                                 | Grosso,     | 2019 | Togo and Burkina Faso                                            | Unknown       | MSM      | Same-sex orientation |
| <a href="https://doi.org/10.1186/s12889-021-12151-3">https://doi.org/10.1186/s12889-021-12151-3</a>                                                                     | Wiginton,   | 2021 | Cameroon, Senegal, Eswatini/Swaziland, Côte d'Ivoire and Lesotho | Unknown       | MSM      | Same-sex orientation |
| <a href="https://www.ncbi.nlm.nih.gov/pmc/articles/PMC8017753/">https://www.ncbi.nlm.nih.gov/pmc/articles/PMC8017753/</a>                                               | Kokogho,    | 2021 | Nigeria                                                          | Urban         | MSM, TGW | Same-sex orientation |
| <a href="https://dx.doi.org/10.1080/09581596.2018.1447647">https://dx.doi.org/10.1080/09581596.2018.1447647</a>                                                         | Gichuru,    | 2018 | Kenya                                                            | Urban         | MSM      | Same-sex orientation |
| <a href="https://doi.org/10.3389/fpubh.2021.653481">https://doi.org/10.3389/fpubh.2021.653481</a>                                                                       | Ky-Zerbo,   | 2021 | Mali, Côte d'Ivoire and Senegal                                  | Urban & Rural | MSM      | HIV                  |
| <a href="https://onlinelibrary.wiley.com/doi/full/10.7448/IAS.16.4.18741">https://onlinelibrary.wiley.com/doi/full/10.7448/IAS.16.4.18741</a>                           | vanderElst, | 2013 | Kenya                                                            | Urban         | MSM      | HIV                  |
| <a href="https://pubmed.ncbi.nlm.nih.gov/25565899/">https://pubmed.ncbi.nlm.nih.gov/25565899/</a>                                                                       | Sekoni,     | 2014 | Nigeria                                                          | Urban         | MSM      | Same-sex orientation |
| <a href="https://journals.plos.org/plosone/article?id=10.1371/journal.pone.0099591">https://journals.plos.org/plosone/article?id=10.1371/journal.pone.0099591</a>       | Aho,        | 2014 | Cote d'Ivoire                                                    | Urban         | MSM      | Same-sex orientation |

|                                                                                                                                                                                                                           |             |      |                             |               |          |                      |
|---------------------------------------------------------------------------------------------------------------------------------------------------------------------------------------------------------------------------|-------------|------|-----------------------------|---------------|----------|----------------------|
| <a href="https://journals.sagepub.com/doi/10.1177/0956462416638967">https://journals.sagepub.com/doi/10.1177/0956462416638967</a>                                                                                         | Shangani,   | 2016 | Kenya                       | Urban         | MSM      | Same-sex orientation |
| <a href="https://pubmed.ncbi.nlm.nih.gov/28746167/">https://pubmed.ncbi.nlm.nih.gov/28746167/</a>                                                                                                                         | Kunzweiler, | 2017 | Kenya                       | Urban & Rural | MSM      | Same-sex orientation |
| <a href="https://pubmed.ncbi.nlm.nih.gov/30897938/">https://pubmed.ncbi.nlm.nih.gov/30897938/</a>                                                                                                                         | Kunzweiler, | 2018 | Kenya                       | Urban         | MSM      | Same-sex orientation |
| <a href="https://doi.org/10.2989/16085906.2021.1981413">https://doi.org/10.2989/16085906.2021.1981413</a>                                                                                                                 | Gumindega,  | 2021 | South Africa                | Urban         | MSM      | HIV                  |
| <a href="https://pubmed.ncbi.nlm.nih.gov/32352969/">https://pubmed.ncbi.nlm.nih.gov/32352969/</a>                                                                                                                         | Pillay,     | 2020 | South Africa                | Rural         | MSM      | HIV (PrEP)           |
| <a href="https://journals.lww.com/jaids/Fulltext/2015/10010/Feasibility_of_a_Combination_HIV_Prevention.7.aspx">https://journals.lww.com/jaids/Fulltext/2015/10010/Feasibility_of_a_Combination_HIV_Prevention.7.aspx</a> | Wirtz,      | 2015 | Malawi                      | Urban         | MSM      | Same-sex orientation |
| <a href="https://dx.doi.org/10.1186/s12939-019-0991-5">https://dx.doi.org/10.1186/s12939-019-0991-5</a>                                                                                                                   | Tadele,     | 2019 | Ethiopia                    | Unknown       | MSM, WSW | Same-sex orientation |
| <a href="https://www.liebertpub.com/doi/10.1089/apc.2016.0213">https://www.liebertpub.com/doi/10.1089/apc.2016.0213</a>                                                                                                   | Micheni,    | 2017 | Kenya                       | Urban         | MSM      | HIV                  |
| <a href="https://bmcinfectdis.biomedcentral.com/articles/10.1186/s12879-019-3713-0">https://bmcinfectdis.biomedcentral.com/articles/10.1186/s12879-019-3713-0</a>                                                         | Matovu,     | 2019 | Uganda                      | Urban & Rural | MSM      | Same-sex orientation |
| <a href="https://pubmed.ncbi.nlm.nih.gov/32701394/">https://pubmed.ncbi.nlm.nih.gov/32701394/</a>                                                                                                                         | Ishungisa,  | 2020 | Tanzania                    | Urban         | MSM      | Same-sex orientation |
| <a href="https://www.tandfonline.com/doi/abs/10.1080/09540121.2020.1776824?journalCode=caic20">https://www.tandfonline.com/doi/abs/10.1080/09540121.2020.1776824?journalCode=caic20</a>                                   | Mbeda,      | 2020 | Kenya, Malawi, South Africa | Urban         | MSM      | Same-sex orientation |
| <a href="https://dx.doi.org/10.1007/s10461-012-0317-8">https://dx.doi.org/10.1007/s10461-012-0317-8</a>                                                                                                                   | VanderElst, | 2013 | Kenya                       | Urban & Rural | MSM      | HIV (PrEP)           |
| <a href="https://pubmed.ncbi.nlm.nih.gov/21271402/">https://pubmed.ncbi.nlm.nih.gov/21271402/</a>                                                                                                                         | Chapman,    | 2011 | Rwanda                      | Urban         | MSM      | Same-sex orientation |
| <a href="http://dx.doi.org/10.1080/09540121.2014.951597">http://dx.doi.org/10.1080/09540121.2014.951597</a>                                                                                                               | Anderson,   | 2015 | Tanzania                    | Urban         | MSM      | Same-sex orientation |
| <a href="https://pubmed.ncbi.nlm.nih.gov/24321110/">https://pubmed.ncbi.nlm.nih.gov/24321110/</a>                                                                                                                         | Wirtz,      | 2013 | Malawi                      | Urban         | MSM      | Same-sex orientation |
| <a href="https://www.tandfonline.com/doi/full/10.1080/09540121.2018.1515471">https://www.tandfonline.com/doi/full/10.1080/09540121.2018.1515471</a>                                                                       | Graham,     | 2019 | Kenya                       | Urban         | MSM      | Same-sex orientation |
| <a href="https://pubmed.ncbi.nlm.nih.gov/22693590/">https://pubmed.ncbi.nlm.nih.gov/22693590/</a>                                                                                                                         | Hladik      | 2012 | Uganda                      | Urban         | MSM      | Same-sex orientation |
| <a href="https://pubmed.ncbi.nlm.nih.gov/33000912/">https://pubmed.ncbi.nlm.nih.gov/33000912/</a>                                                                                                                         | Rwema,      | 2020 | Rwanda                      | Urban         | MSM      | Same-sex orientation |

|                                                                                                                           |              |      |                                                                                                 |               |          |                      |
|---------------------------------------------------------------------------------------------------------------------------|--------------|------|-------------------------------------------------------------------------------------------------|---------------|----------|----------------------|
| <a href="https://dx.doi.org/10.1371/journal.pmed.1002422">https://dx.doi.org/10.1371/journal.pmed.1002422</a>             | Poteat,      | 2017 | Burkina Faso, Côte d'Ivoire, The Gambia, Lesotho, Malawi, Senegal, Eswatini/Swaziland, and Togo | Urban         | MSM      | Same-sex orientation |
| <a href="https://dx.doi.org/10.2989/16085906.2017.1379420">https://dx.doi.org/10.2989/16085906.2017.1379420</a>           | Sithole,     | 2017 | Eswatini/Swaziland                                                                              | Urban         | MSM      | Same-sex orientation |
| <a href="http://dx.doi.org/10.1371/journal.pone.0028760">http://dx.doi.org/10.1371/journal.pone.0028760</a>               | Poteat,      | 2011 | Senegal                                                                                         | Urban & Rural | MSM      | Same-sex orientation |
| <a href="https://pubmed.ncbi.nlm.nih.gov/28367747/">https://pubmed.ncbi.nlm.nih.gov/28367747/</a>                         | Maleke,      | 2017 | South Africa                                                                                    | Rural         | MSM      | Same-sex orientation |
| <a href="https://dx.doi.org/10.1186/s12889-020-09315-y">https://dx.doi.org/10.1186/s12889-020-09315-y</a>                 | Tiamiyu,     | 2020 | Nigeria                                                                                         | Urban         | MSM, TGW | Same-sex orientation |
| <a href="https://doi.org/10.1007/s10461-020-03129-0">https://doi.org/10.1007/s10461-020-03129-0</a>                       | Stephenson , | 2021 | South Africa and Namibia                                                                        | Urban         | MSM      | Same-sex orientation |
| <a href="https://dx.doi.org/10.1080/13691058.2011.607244">https://dx.doi.org/10.1080/13691058.2011.607244</a>             | Kalamar,     | 2011 | Cameroon                                                                                        | Unknown       | MSM      | Same-sex orientation |
| <a href="https://pubmed.ncbi.nlm.nih.gov/23054041/">https://pubmed.ncbi.nlm.nih.gov/23054041/</a>                         | Nel,         | 2013 | South Africa                                                                                    | Unknown       | MSM      | Same-sex orientation |
| <a href="http://hdl.handle.net/10394/6272">http://hdl.handle.net/10394/6272</a>                                           | Grundlingh , | 1999 | South Africa                                                                                    | Urban & Rural | MSM      | HIV                  |
| <a href="https://pubmed.ncbi.nlm.nih.gov/33306548/">https://pubmed.ncbi.nlm.nih.gov/33306548/</a>                         | Fiorentino,  | 2021 | Mali, Burkina Faso, Côte d'Ivoire, and Togo                                                     | Unknown       | MSM      | Same-sex orientation |
| <a href="https://pubmed.ncbi.nlm.nih.gov/24295155/">https://pubmed.ncbi.nlm.nih.gov/24295155/</a>                         | Tucker,      | 2014 | South Africa                                                                                    | Urban         | MSM      | Same-sex orientation |
| <a href="https://doi.org/10.1080/13533312.2013.846136">https://doi.org/10.1080/13533312.2013.846136</a>                   | Nyanzi,      | 2013 | Uganda                                                                                          | Urban & Rural | MSM      | Same-sex orientation |
| <a href="https://psycnet.apa.org/record/2016-19917-002">https://psycnet.apa.org/record/2016-19917-002</a>                 | Midoun,      | 2015 | Kenya                                                                                           | Unknown       | MSM      | Same-sex orientation |
| <a href="https://www.ncbi.nlm.nih.gov/pmc/articles/PMC7245422/">https://www.ncbi.nlm.nih.gov/pmc/articles/PMC7245422/</a> | King,        | 2020 | Uganda                                                                                          | Urban         | MSM      | Same-sex orientation |
| <a href="https://dx.doi.org/10.1371/journal.pone.0147156">https://dx.doi.org/10.1371/journal.pone.0147156</a>             | Zahn,        | 2016 | South Africa, Botswana, Malawi, and Namibia                                                     | Urban         | MSM      | Same-sex orientation |

|                                                                                                                                                                   |                   |      |                    |               |                 |                                              |
|-------------------------------------------------------------------------------------------------------------------------------------------------------------------|-------------------|------|--------------------|---------------|-----------------|----------------------------------------------|
| <a href="https://pubmed.ncbi.nlm.nih.gov/32879956/">https://pubmed.ncbi.nlm.nih.gov/32879956/</a>                                                                 | Dirisu,           | 2020 | Nigeria            | Urban         | MSM             | HIV                                          |
| <a href="http://dx.doi.org/10.20853/31-4-894">http://dx.doi.org/10.20853/31-4-894</a>                                                                             | Mavhandu-Mudzusi, | 2017 | South Africa       | Rural         | MSM, WSW        | Same-sex orientation                         |
| <a href="https://www.tandfonline.com/doi/abs/10.1080/09709274.2017.1311656">https://www.tandfonline.com/doi/abs/10.1080/09709274.2017.1311656</a>                 | Mushoriwa,        | 2017 | South Africa       | Unknown       | MSM, WSW        | Same-sex orientation                         |
| <a href="https://doi.org/10.1080/09540121.2020.1828564">https://doi.org/10.1080/09540121.2020.1828564</a>                                                         | Chen,             | 2021 | South Africa       | Urban & Rural | MSM             | HIV                                          |
| <a href="https://pubmed.ncbi.nlm.nih.gov/26117222/">https://pubmed.ncbi.nlm.nih.gov/26117222/</a>                                                                 | Cange,            | 2015 | Cameroon           | Urban         | MSM             | Same-sex orientation                         |
| <a href="https://pubmed.ncbi.nlm.nih.gov/23970711/">https://pubmed.ncbi.nlm.nih.gov/23970711/</a>                                                                 | Ross,             | 2013 | Uganda             | Urban         | MSM, WSW        | Same-sex orientation                         |
| <a href="https://pubmed.ncbi.nlm.nih.gov/33112907/">https://pubmed.ncbi.nlm.nih.gov/33112907/</a>                                                                 | Muwonge,          | 2020 | Uganda             | Urban & Rural | MSM             | HIV (PrEP)                                   |
| <a href="https://dx.doi.org/10.1080/09540121.2018.1468011">https://dx.doi.org/10.1080/09540121.2018.1468011</a>                                                   | Logie,            | 2018 | Eswatini/Swaziland | Unknown       | MSM, WSW, Other | Transgender identity or same-sex orientation |
| <a href="https://doi.org/10.1108/IJHRH-10-2017-0066">https://doi.org/10.1108/IJHRH-10-2017-0066</a>                                                               | Sholeye,          | 2018 | Nigeria            | Urban         | MSM, WSW        | Same-sex orientation                         |
| <a href="https://journals.plos.org/plosone/article?id=10.1371/journal.pone.0082937">https://journals.plos.org/plosone/article?id=10.1371/journal.pone.0082937</a> | King,             | 2013 | Uganda             | Urban         | MSM             | Same-sex orientation                         |
| <a href="https://pubmed.ncbi.nlm.nih.gov/27427168/">https://pubmed.ncbi.nlm.nih.gov/27427168/</a>                                                                 | Dah,              | 2016 | Burkina Faso       | Urban         | MSM             | HIV                                          |
| <a href="https://link.springer.com/article/10.1007%2Fs10461-016-1535-2">https://link.springer.com/article/10.1007%2Fs10461-016-1535-2</a>                         | Hladik,           | 2017 | Uganda             | Urban         | MSM             | Same-sex orientation                         |
| <a href="https://www.tandfonline.com/doi/abs/10.1080/00918369.2014.951261">https://www.tandfonline.com/doi/abs/10.1080/00918369.2014.951261</a>                   | Okall,            | 2014 | Kenya              | Urban         | MSM             | Same-sex orientation                         |
| <a href="https://pubmed.ncbi.nlm.nih.gov/24321116/">https://pubmed.ncbi.nlm.nih.gov/24321116/</a>                                                                 | Batist,           | 2013 | South Africa       | Urban         | MSM             | Same-sex orientation                         |
| <a href="https://www.ncbi.nlm.nih.gov/pmc/articles/PMC5889084/pdf/nihms905468.pdf">https://www.ncbi.nlm.nih.gov/pmc/articles/PMC5889084/pdf/nihms905468.pdf</a>   | Rodriguez-Hart,   | 2017 | Nigeria            | Urban         | MSM             | Same-sex orientation                         |
| <a href="https://www.ajol.info/index.php/thrb/article/view/136146/152357">https://www.ajol.info/index.php/thrb/article/view/136146/152357</a>                     | Magesa,           | 2017 | Tanzania           | Urban         | MSM             | Same-sex orientation                         |
| <a href="http://dx.doi.org/10.5114/hivar.2019.85923">http://dx.doi.org/10.5114/hivar.2019.85923</a>                                                               | Kigumi,           | 2019 | Tanzania           | Unknown       | MSM             | Same-sex orientation                         |
| <a href="http://dx.doi.org/10.1097/qai.0000000000001209">http://dx.doi.org/10.1097/qai.0000000000001209</a>                                                       | Lyons,            | 2017 | Senegal            | Unknown       | MSM             | Same-sex orientation                         |

|                                                                                                                                                                             |                    |      |                                 |               |          |                      |
|-----------------------------------------------------------------------------------------------------------------------------------------------------------------------------|--------------------|------|---------------------------------|---------------|----------|----------------------|
| <a href="https://doi.org/10.1080/13691058.2019.1636291">https://doi.org/10.1080/13691058.2019.1636291</a>                                                                   | Essack,            | 2020 | South Africa and Namibia        | Urban         | MSM      | Same-sex orientation |
| <a href="https://www.ncbi.nlm.nih.gov/pmc/articles/PMC6844236/">https://www.ncbi.nlm.nih.gov/pmc/articles/PMC6844236/</a>                                                   | Peltzer,           | 2019 | South Africa                    | Urban         | Other    | HIV                  |
| <a href="https://pubmed.ncbi.nlm.nih.gov/31072120/">https://pubmed.ncbi.nlm.nih.gov/31072120/</a>                                                                           | Ruisenor-Escudero, | 2019 | Togo                            | Urban         | MSM      | Same-sex orientation |
| <a href="https://pubmed.ncbi.nlm.nih.gov/23444540/">https://pubmed.ncbi.nlm.nih.gov/23444540/</a>                                                                           | Adebajo,           | 2012 | Nigeria                         | Urban         | MSM      | Same-sex orientation |
| <a href="http://dx.doi.org/10.1080/09540121.2012.668172">http://dx.doi.org/10.1080/09540121.2012.668172</a>                                                                 | Lorente,           | 2012 | Cameroon                        | Urban         | MSM      | HIV                  |
| <a href="https://dx.doi.org/10.1007/s10508-021-01943-8">https://dx.doi.org/10.1007/s10508-021-01943-8</a>                                                                   | Ogunbajo,          | 2021 | Nigeria                         | Urban & Rural | MSM      | Same-sex orientation |
| <a href="https://pubmed.ncbi.nlm.nih.gov/30257574/">https://pubmed.ncbi.nlm.nih.gov/30257574/</a>                                                                           | Pilgrim,           | 2019 | Zambia                          | Urban & Rural | MSM      | Same-sex orientation |
| <a href="https://www.sciencedirect.com/science/article/pii/S0376871607005066?via%3Dihub">https://www.sciencedirect.com/science/article/pii/S0376871607005066?via%3Dihub</a> | Parry,             | 2008 | South Africa                    | Urban         | MSM      | Same-sex orientation |
| <a href="https://pubmed.ncbi.nlm.nih.gov/34228627/">https://pubmed.ncbi.nlm.nih.gov/34228627/</a>                                                                           | Mpunga,            | 2021 | Malawi                          | Urban & Rural | MSM      | Same-sex orientation |
| <a href="https://doi.org/10.4324/9780429342868-10">https://doi.org/10.4324/9780429342868-10</a>                                                                             | Balogun-Katung,    | 2021 | Nigeria                         | Urban         | MSM      | Same-sex orientation |
| <a href="https://dx.doi.org/10.1002/jia2.25592">https://dx.doi.org/10.1002/jia2.25592</a>                                                                                   | Kayode,            | 2017 | Nigeria                         | Urban         | MSM      | Same-sex orientation |
| <a href="https://dx.doi.org/10.2196/publichealth.8116">https://dx.doi.org/10.2196/publichealth.8116</a>                                                                     | Rao,               | 2017 | Eswatini/Swaziland and Cameroon | Urban         | MSM      | Same-sex orientation |
| <a href="https://doi.org/10.1186/s12913-019-4691-z">https://doi.org/10.1186/s12913-019-4691-z</a>                                                                           | Ochonye,           | 2019 | Nigeria                         | Urban         | MSM, WSW | Same-sex orientation |
| <a href="https://pdf.usaid.gov/pdf_docs/pnacs028.pdf">https://pdf.usaid.gov/pdf_docs/pnacs028.pdf</a>                                                                       | Niang,             | 2002 | Senegal                         | Urban         | MSM      | Same-sex orientation |
| <a href="https://pubmed.ncbi.nlm.nih.gov/34406550/">https://pubmed.ncbi.nlm.nih.gov/34406550/</a>                                                                           | Shangani,          | 2021 | Kenya                           | Urban & Rural | MSM      | Same-sex orientation |
| <a href="https://onlinelibrary.wiley.com/doi/10.7448/IAS.16.3.18715">https://onlinelibrary.wiley.com/doi/10.7448/IAS.16.3.18715</a>                                         | Risher,            | 2013 | Eswatini/Swaziland              | Urban & Rural | MSM      | Same-sex orientation |
| <a href="https://dx.doi.org/10.1007/s10461-017-1982-4">https://dx.doi.org/10.1007/s10461-017-1982-4</a>                                                                     | Rodriguez-Hart,    | 2018 | Nigeria                         | Urban         | MSM      | Same-sex orientation |
| <a href="https://doi.org/10.1080/09540121.2015.1131971">https://doi.org/10.1080/09540121.2015.1131971</a>                                                                   | Grover,            | 2016 | Eswatini/Swaziland              | Urban         | MSM      | Same-sex orientation |

|                                                                                                                                                                                                                                                                                                                                                                                                                         |               |      |                               |               |                 |                      |
|-------------------------------------------------------------------------------------------------------------------------------------------------------------------------------------------------------------------------------------------------------------------------------------------------------------------------------------------------------------------------------------------------------------------------|---------------|------|-------------------------------|---------------|-----------------|----------------------|
| <a href="https://pubmed.ncbi.nlm.nih.gov/19484638/">https://pubmed.ncbi.nlm.nih.gov/19484638/</a>                                                                                                                                                                                                                                                                                                                       | OkaI,         | 2008 | Kenya                         | Urban         | MSM             | Same-sex orientation |
| <a href="https://journals.plos.org/plosone/article?id=10.1371/journal.pone.0211099">https://journals.plos.org/plosone/article?id=10.1371/journal.pone.0211099</a>                                                                                                                                                                                                                                                       | Adedimeji,    | 2019 | Rwanda                        | Urban         | MSM             | Same-sex orientation |
| <a href="http://dx.doi.org/10.1258/ijisa.2011.010350">http://dx.doi.org/10.1258/ijisa.2011.010350</a>                                                                                                                                                                                                                                                                                                                   | Knox,         | 2011 | South Africa                  | Urban & Rural | MSM             | Same-sex orientation |
| <a href="https://pubmed.ncbi.nlm.nih.gov/19024336/">https://pubmed.ncbi.nlm.nih.gov/19024336/</a>                                                                                                                                                                                                                                                                                                                       | Ntata,        | 2008 | Malawi                        | Urban & Rural | MSM             | Same-sex orientation |
| <a href="https://www.ncbi.nlm.nih.gov/pmc/articles/PMC9066634/">https://www.ncbi.nlm.nih.gov/pmc/articles/PMC9066634/</a>                                                                                                                                                                                                                                                                                               | Dibble,       | 2022 | Senegal                       | Urban         | MSM, TGW        | Same-sex orientation |
| <a href="https://dx.doi.org/10.1089/apc.2019.0131">https://dx.doi.org/10.1089/apc.2019.0131</a>                                                                                                                                                                                                                                                                                                                         | Krishnaratne, | 2020 | South Africa and Zambia       | Urban         | MSM             | Same-sex orientation |
| <a href="https://dx.doi.org/10.1186/s12879-019-3711-2">https://dx.doi.org/10.1186/s12879-019-3711-2</a>                                                                                                                                                                                                                                                                                                                 | Lyons,        | 2019 | Eswatini/Swaziland            | Urban & Rural | MSM, TGW        | Same-sex orientation |
| <a href="https://regroup-production.s3.amazonaws.com/documents/ReviewReference/275018801/Kim_2018.pdf?AWSAccessKeyId=AKIAJBZQODCMKJA4H7DA&amp;Expires=1627205726&amp;Signature=vXpVEXIojAZPKPsMyhVtWvMIukU%3D">https://regroup-production.s3.amazonaws.com/documents/ReviewReference/275018801/Kim_2018.pdf?AWSAccessKeyId=AKIAJBZQODCMKJA4H7DA&amp;Expires=1627205726&amp;Signature=vXpVEXIojAZPKPsMyhVtWvMIukU%3D</a> | Kim,          | 2018 | Burkina Faso                  | Urban         | MSM             | Same-sex orientation |
| <a href="https://onlinelibrary.wiley.com/doi/full/10.7448/IAS.20.01.21489">https://onlinelibrary.wiley.com/doi/full/10.7448/IAS.20.01.21489</a>                                                                                                                                                                                                                                                                         | Crowell,      | 2017 | Nigeria                       | Urban         | MSM             | Same-sex orientation |
| <a href="https://dx.doi.org/10.1080/09540121.2020.1757020">https://dx.doi.org/10.1080/09540121.2020.1757020</a>                                                                                                                                                                                                                                                                                                         | Gyamerah,     | 2020 | Ghana                         | Unknown       | MSM             | Same-sex orientation |
| <a href="https://link.springer.com/article/10.1007/s10461-010-9861-2">https://link.springer.com/article/10.1007/s10461-010-9861-2</a>                                                                                                                                                                                                                                                                                   | Fay,          | 2010 | Malawi, Namibia, and Botswana | Urban         | MSM             | Same-sex orientation |
| <a href="https://academic.oup.com/jhrp/article/7/1/139/2190398">https://academic.oup.com/jhrp/article/7/1/139/2190398</a>                                                                                                                                                                                                                                                                                               | Mason,        | 2015 | Gambia                        | Urban         | MSM             | Same-sex orientation |
| <a href="https://www.ncbi.nlm.nih.gov/pmc/articles/PMC9372004/">https://www.ncbi.nlm.nih.gov/pmc/articles/PMC9372004/</a>                                                                                                                                                                                                                                                                                               | Miller,       | 2022 | Zimbabwe                      | Urban         | MSM, TGW, Other | Same-sex orientation |
| <a href="https://pubmed.ncbi.nlm.nih.gov/25809638/">https://pubmed.ncbi.nlm.nih.gov/25809638/</a>                                                                                                                                                                                                                                                                                                                       | Nelson,       | 2015 | Ghana                         | Urban         | MSM             | HIV                  |
| <a href="https://pubmed.ncbi.nlm.nih.gov/30582734/">https://pubmed.ncbi.nlm.nih.gov/30582734/</a>                                                                                                                                                                                                                                                                                                                       | Icard,        | 2020 | South Africa                  | Unknown       | MSM             | Same-sex orientation |
| <a href="https://dx.doi.org/10.1002/jia2.25600">https://dx.doi.org/10.1002/jia2.25600</a>                                                                                                                                                                                                                                                                                                                               | Sandfort,     | 2020 | Kenya, Malawi, South Africa   | Urban         | MSM             | Same-sex orientation |



|                                                                                                                                                                                                                                                                                                                             |                                |      |                                             |               |          |                      |
|-----------------------------------------------------------------------------------------------------------------------------------------------------------------------------------------------------------------------------------------------------------------------------------------------------------------------------|--------------------------------|------|---------------------------------------------|---------------|----------|----------------------|
| <a href="https://www.ncbi.nlm.nih.gov/pmc/articles/PMC4615801/">https://www.ncbi.nlm.nih.gov/pmc/articles/PMC4615801/</a>                                                                                                                                                                                                   | van der Elst,                  | 2015 | Kenya                                       | Unknown       | MSM      | Same-sex orientation |
| <a href="http://dx.doi.org/10.1016/S2352-3018(15)00078-8">http://dx.doi.org/10.1016/S2352-3018(15)00078-8</a>                                                                                                                                                                                                               | Schwartz,                      | 2015 | Nigeria                                     | Urban         | MSM      | Same-sex orientation |
| <a href="https://doi.org/10.25159/2520-5293/1759">https://doi.org/10.25159/2520-5293/1759</a>                                                                                                                                                                                                                               | Mampane,                       | 2017 | South Africa                                | Rural         | MSM      | HIV                  |
| <a href="https://www.khrc.or.ke/index.php/mobile-publications/equality-and-anti-discrimination/70-the-outlawed-amongst-us?path=equality-and-anti-discrimination">https://www.khrc.or.ke/index.php/mobile-publications/equality-and-anti-discrimination/70-the-outlawed-amongst-us?path=equality-and-anti-discrimination</a> | Kenya Human Rights Commission, | 2011 | Kenya                                       | Urban & Rural | MSM, WSW | Same-sex orientation |
| <a href="https://pubmed.ncbi.nlm.nih.gov/32881790/">https://pubmed.ncbi.nlm.nih.gov/32881790/</a>                                                                                                                                                                                                                           | Friedland,                     | 2020 | Cameroon, Senegal, and Uganda               | Urban         | MSM      | HIV                  |
| <a href="https://www.ncbi.nlm.nih.gov/pmc/articles/PMC4978863/?report=printable">https://www.ncbi.nlm.nih.gov/pmc/articles/PMC4978863/?report=printable</a>                                                                                                                                                                 | Stahlman,                      | 2014 | Sub-Saharan Africa                          | Urban         | MSM      | Same-sex orientation |
| <a href="https://pubmed.ncbi.nlm.nih.gov/31661668/">https://pubmed.ncbi.nlm.nih.gov/31661668/</a>                                                                                                                                                                                                                           | Mutanga                        | 2020 | Zimbabwe                                    | Urban         | MSM      | Same-sex orientation |
| <a href="https://bmcinthealthhumrights.biomedcentral.com/articles/10.1186/s12914-019-0186-6">https://bmcinthealthhumrights.biomedcentral.com/articles/10.1186/s12914-019-0186-6</a>                                                                                                                                         | Ulanja                         | 2019 | Côte d'Ivoire                               | Urban         | MSM      | Same-sex orientation |
|                                                                                                                                                                                                                                                                                                                             | Okonkwo,                       | 2021 | Rwanda                                      | Urban         | MSM, TGW | Same-sex orientation |
| <a href="https://dx.doi.org/10.1007/s10461-018-2191-5">https://dx.doi.org/10.1007/s10461-018-2191-5</a>                                                                                                                                                                                                                     | Rodriguez-Hart,                | 2018 | Nigeria                                     | Urban         | MSM      | Same-sex orientation |
| <a href="https://onlinelibrary-wiley-com.yale.idm.oclc.org/doi/full/10.1046/j.1365-2648.2001.01922.x">https://onlinelibrary-wiley-com.yale.idm.oclc.org/doi/full/10.1046/j.1365-2648.2001.01922.x</a>                                                                                                                       | Ehlers,                        | 2001 | Botswana                                    | Unknown       | MSM, WSW | Same-sex orientation |
| <a href="https://doi.org/10.1371/journal.pone.0217115">https://doi.org/10.1371/journal.pone.0217115</a>                                                                                                                                                                                                                     | KountaI,                       | 2019 | Burkina Faso, Cote d'Ivoire, Togo, and Mali | Urban         | MSM      | Same-sex orientation |
| <a href="https://dx.doi.org/10.1080/09540121.2017.1280122">https://dx.doi.org/10.1080/09540121.2017.1280122</a>                                                                                                                                                                                                             | Ruisenor-Escudero,             | 2017 | Togo                                        | Urban         | MSM      | Same-sex orientation |
| <a href="https://www.ncbi.nlm.nih.gov/pmc/articles/PMC6060376/">https://www.ncbi.nlm.nih.gov/pmc/articles/PMC6060376/</a>                                                                                                                                                                                                   | Abaver,                        | 2019 | South Africa                                | Rural         | Other    | Same-sex orientation |
| <a href="https://journals.sagepub.com/doi/pdf/10.1177/1557988318823883">https://journals.sagepub.com/doi/pdf/10.1177/1557988318823883</a>                                                                                                                                                                                   | Tsang,                         | 2018 | Zimbabwe                                    | Urban         | MSM      | Same-sex orientation |

|                                                                                                                                                                                                   |           |      |              |       |                 |                                              |
|---------------------------------------------------------------------------------------------------------------------------------------------------------------------------------------------------|-----------|------|--------------|-------|-----------------|----------------------------------------------|
| <a href="https://dx.doi.org/10.1080/13557858.2020.1817342">https://dx.doi.org/10.1080/13557858.2020.1817342</a>                                                                                   | Alessi,   | 2020 | South Africa | Urban | MSM, WSW, Other | Transgender identity or same-sex orientation |
| <a href="https://www.tandfonline.com/doi/full/10.1080/09540120701842720">https://www.tandfonline.com/doi/full/10.1080/09540120701842720</a>                                                       | Cloete    | 2008 | South Africa | Urban | MSM             | HIV                                          |
| <a href="https://www.tandfonline.com/doi/full/10.1016/j.rhm.2015.11.020">https://www.tandfonline.com/doi/full/10.1016/j.rhm.2015.11.020</a>                                                       | Poteat,   | 2015 | Lesotho      | Urban | WSW             | Same-sex orientation                         |
| <a href="https://doi.org/10.1080/17441692.2020.1834598">https://doi.org/10.1080/17441692.2020.1834598</a>                                                                                         | Ogunbajo, | 2021 | Nigeria      | Urban | MSM             | Same-sex orientation                         |
| <a href="https://doi.org/10.1080/17441692.2020.1860248">https://doi.org/10.1080/17441692.2020.1860248</a>                                                                                         | Shangani, | 2022 | Kenya        | Urban | MSM             | Same-sex orientation                         |
| <a href="https://doi.org/10.4102/hsag.v26i0.1462">https://doi.org/10.4102/hsag.v26i0.1462</a>                                                                                                     | Moyo,     | 2021 | Zimbabwe     | Urban | MSM             | Same-sex orientation                         |
| <a href="https://out.org.za/wp-content/uploads/2020/10/healthcare_in_gauteng_research_findings.pdf">https://out.org.za/wp-content/uploads/2020/10/healthcare_in_gauteng_research_findings.pdf</a> | Wells,    | 2004 | South Africa | Urban | MSM, WSW        | Same-sex orientation                         |
| <a href="https://journals.plos.org/plosone/article?id=10.1371/journal.pone.0244226">https://journals.plos.org/plosone/article?id=10.1371/journal.pone.0244226</a>                                 | Kimani,   | 2021 | Kenya        | Urban | MSM, TGW        | HIV                                          |

**\*(Other= Unspecified or other sexual and/or gender minorities)**
